## CORRECTION

# Correction: In-season internal and external training load quantification of an elite European soccer team

Rafael Oliveira, João P. Brito, Alexandre Martins, Bruno Mendes, Daniel A. Marinho, Ricardo Ferraz, Mário C. Marques

In the fifth paragraph of In-season mesocycle analysis subsection of Discussion, there is an error in the sixth sentence. The correct sentence is: In addition, when we compared the distance covered in high-speed high-speed distance (>19 km/h) during in-season mesocycle analysis to positions played, a significant difference was found between positions only for M1 when comparing CD vs WD and WD vs WM.

In the last paragraph of In-season mesocycle analysis subsection of Discussion, there is an error in the first sentence. The correct sentence is: As suggested by Clemente et al. (2017) study, we also correlated HI scores with s-RPE and external TL variables, and some correlations could be observed: stress and total distance in M1 (-6.34,  $p < 0.01$ ); fatigue and s-RPE in M8 (0.589,  $p < 0.05$ ); muscle soreness and s-RPE in M8 (0.487,  $p < 0.05$ ); fatigue and s-RPE in M10 (0.469,  $p < 0.05$ ); and HI total score and total distance in M10 (0.489,  $p < 0.05$ ).

In [Fig 3](#), the legend is incomplete. Please see the correct and complete legend of [Fig 3](#) here.

In [Fig 4](#), the image for Hopper Index did not match with the results. Please see the correct [Fig 4](#) here.

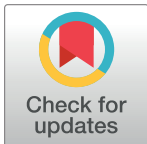

## OPEN ACCESS

**Citation:** Oliveira R, Brito JP, Martins A, Mendes B, Marinho DA, Ferraz R, et al. (2024) Correction: In-season internal and external training load quantification of an elite European soccer team. PLoS ONE 19(5): e0303763. <https://doi.org/10.1371/journal.pone.0303763>

**Published:** May 9, 2024

**Copyright:** © 2024 Oliveira et al. This is an open access article distributed under the terms of the [Creative Commons Attribution License](#), which permits unrestricted use, distribution, and reproduction in any medium, provided the original author and source are credited.

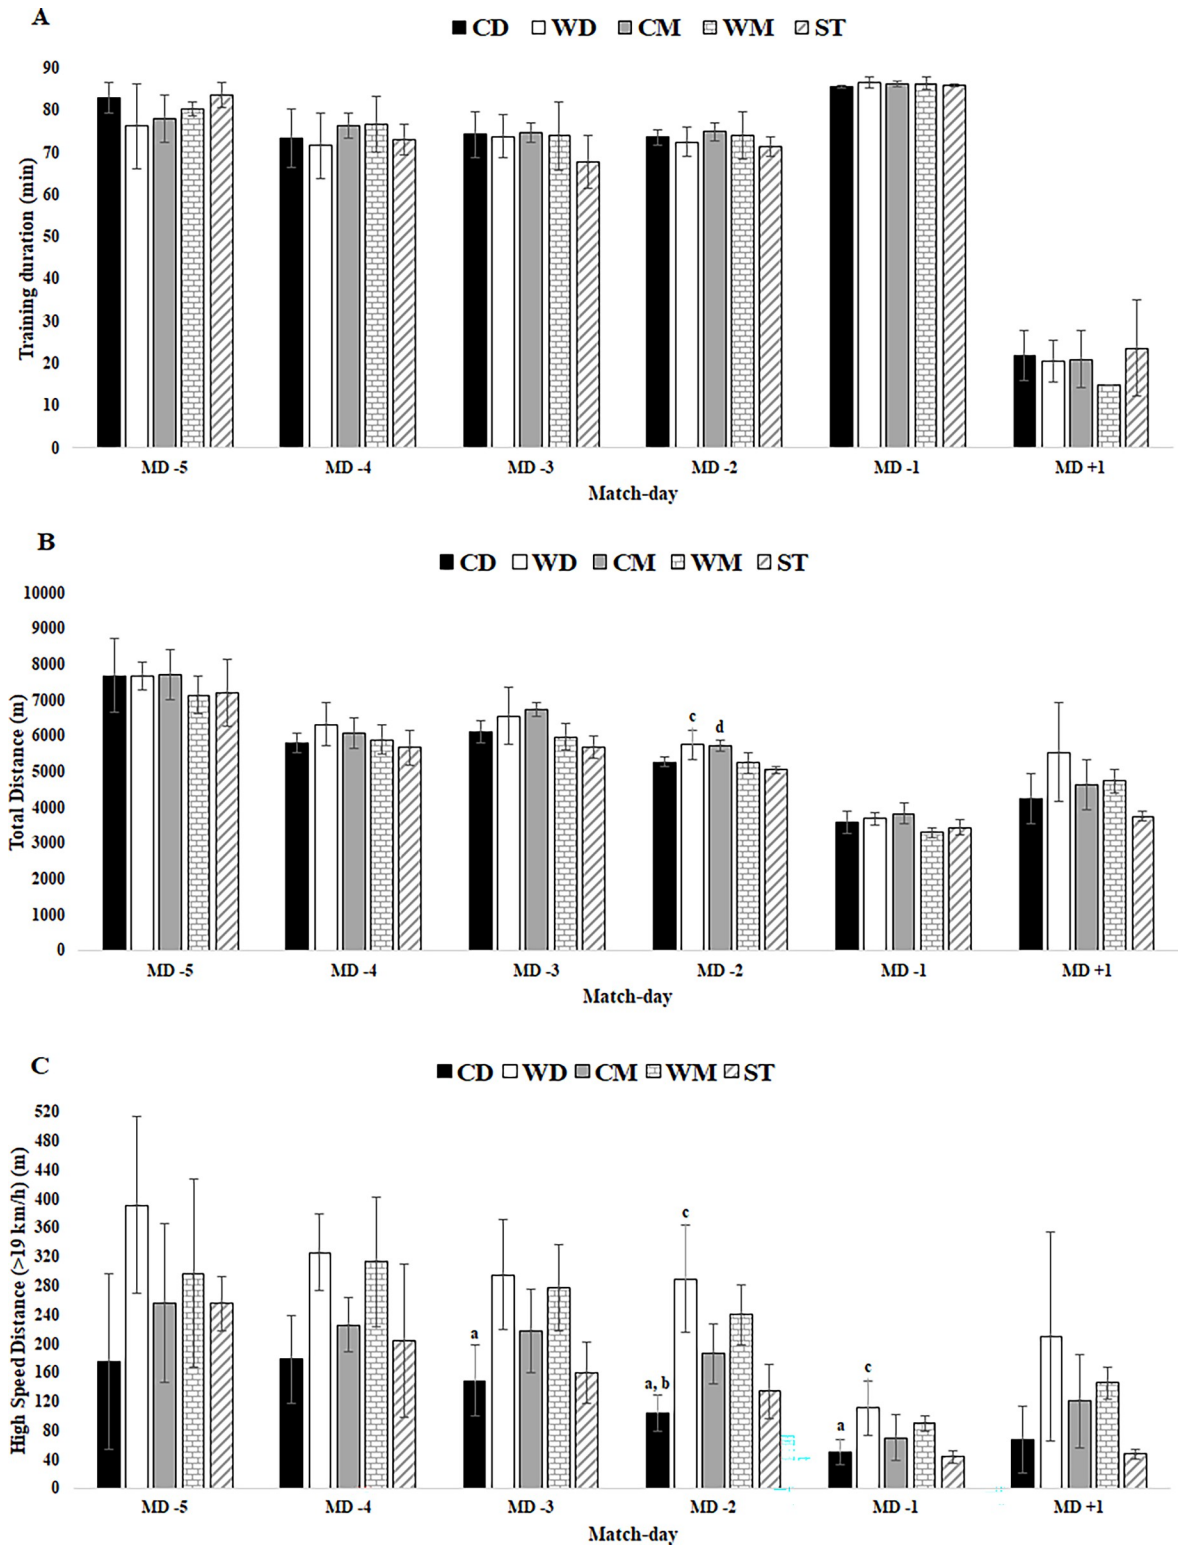

**Fig 3. External TL data for training duration, total distance and HSD in respect to days before a competitive match between player positions.** Abbreviations: A) training duration; B) total distance; C) HSD; (CD), central defenders; (WD), wide defenders; (CM), central midfielders; (WM), wide midfielders; (ST), strikers. (a) denotes significant difference in CD versus WD, (b) denotes significant difference in CD versus WM; (c) denotes significant difference in WD versus ST; (d) denotes significant difference in CM versus ST.

<https://doi.org/10.1371/journal.pone.0303763.g001>

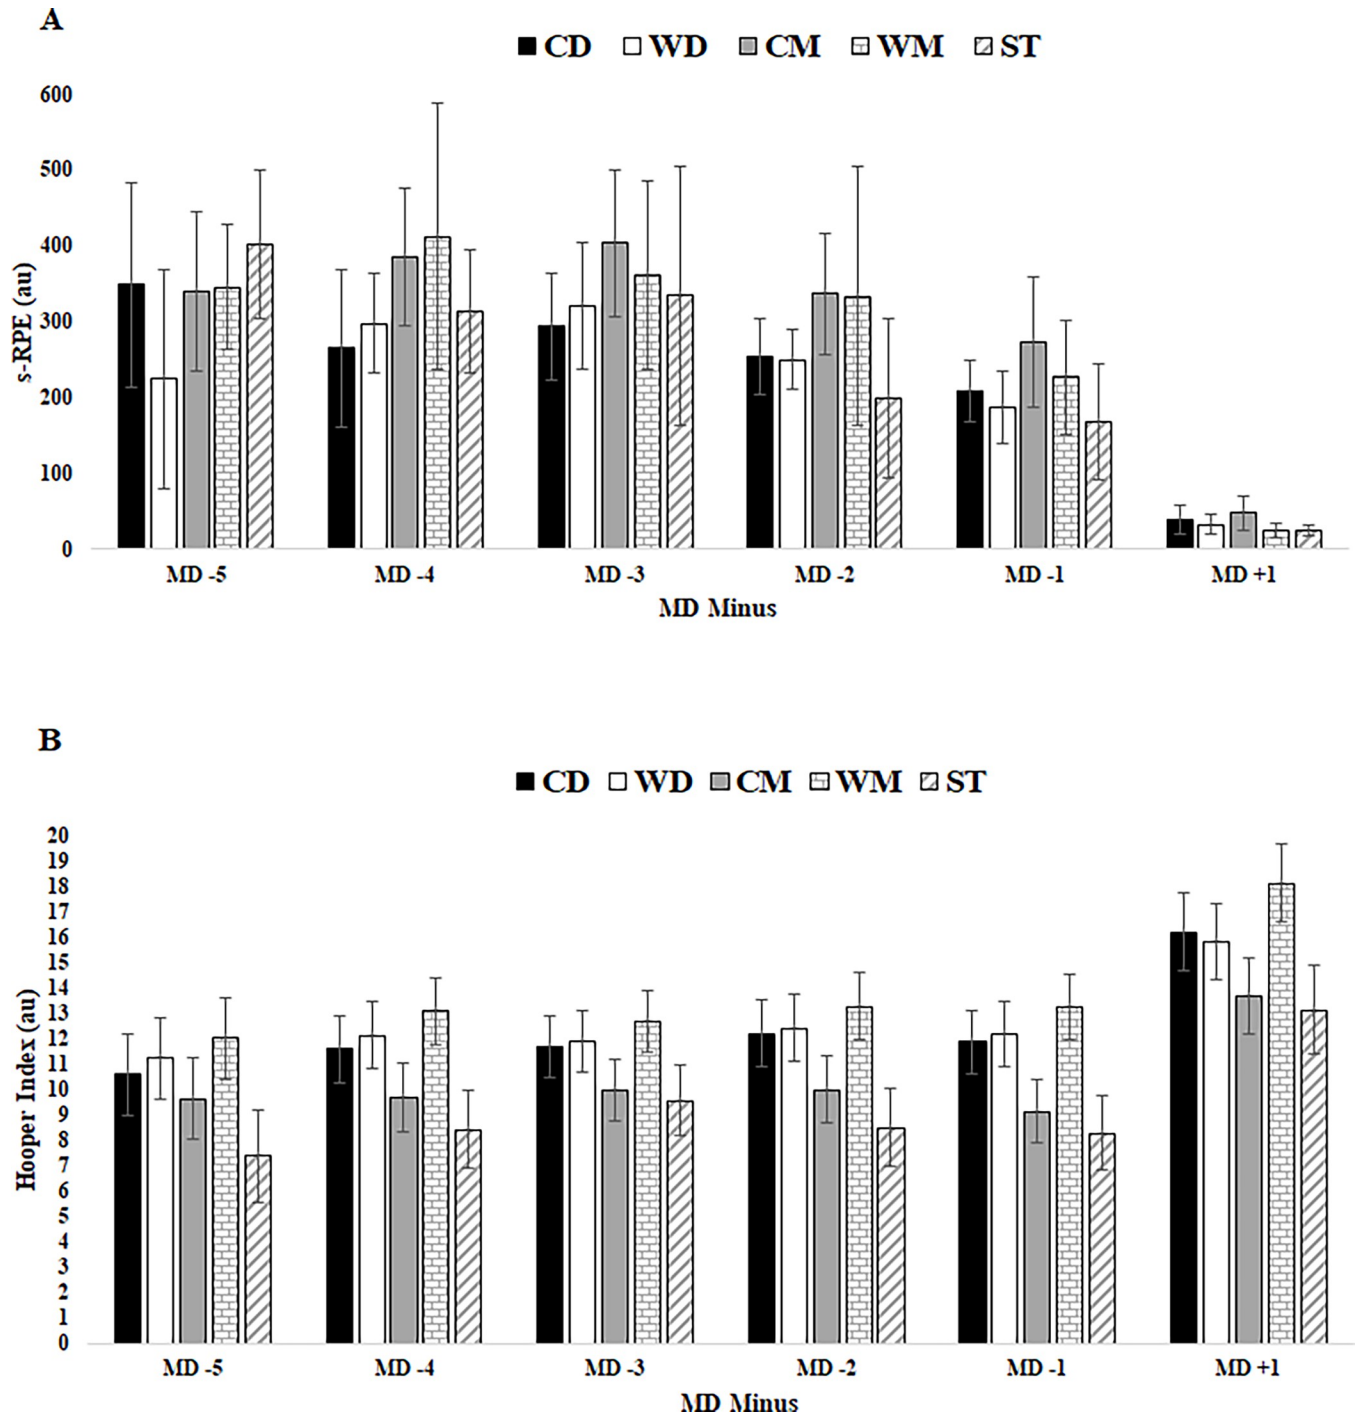

**Fig 4. Internal TL data for s-RPE and HI in respect to days before a competitive match between player positions.** Abbreviations: A) s-RPE; (B) HI; (CD), central defenders; (WD), wide defenders; (CM), central midfielders; (WM), wide midfielders; (ST), strikers. (a) denotes significant difference in CD versus WD, (b) denotes.

<https://doi.org/10.1371/journal.pone.0303763.g002>

## Reference

1. Oliveira R, Brito JP, Martins A, Mendes B, Marinho DA, Ferraz R, et al. (2019) In-season internal and external training load quantification of an elite European soccer team. PLoS ONE 14(4): e0209393. <https://doi.org/10.1371/journal.pone.0209393> PMID: 31009464
